# Supplementary material for: Dynamics of inflammation-associated plasma proteins following faecal microbiota transplantation in patients with psoriatic arthritis and healthy controls: exploratory findings from the FLORA trial
Source: PubMed Central journal article supplement — RMD Open. 2024 Jan 30;10(1):e003750. doi: 10.1136/rmdopen-2023-003750 (PMC10836383; doi:10.1136/rmdopen-2023-003750), 2024-01-30
Supplement: rmdopen-2023-003750supp001.pdf [file rmdopen-2023-003750supp001.pdf]

**Table S1** Olink inflammation panel.

|                                                                        |
|------------------------------------------------------------------------|
| Adenosine Deaminase (ADA)                                              |
| Artemin (ARTN)                                                         |
| Axin-1 (AXIN1)                                                         |
| Beta-nerve growth factor (Beta-NGF)                                    |
| Caspase 8 (CASP-8 )                                                    |
| C-C motif chemokine 4 (CCL4 )                                          |
| C-C motif chemokine 19 (CCL19)                                         |
| C-C motif chemokine 20 (CCL20)                                         |
| C-C motif chemokine 23 (CCL23)                                         |
| C-C motif chemokine 25 (CCL25)                                         |
| C-C motif chemokine 28 (CCL28)                                         |
| CD40L receptor (CD40)                                                  |
| CUB domain-containing protein 1 (CDCP1)                                |
| C-X-C motif chemokine 1 (CXCL1)                                        |
| C-X-C motif chemokine 5 (CXCL5)                                        |
| C-X-C motif chemokine 6 (CXCL6)                                        |
| C-X-C motif chemokine 9 (CXCL9 )                                       |
| C-X-C motif chemokine 10 (CXCL10)                                      |
| C-X-C motif chemokine 11 (CXCL11)                                      |
| Cystatin D (CST5)                                                      |
| Delta and Notch-like epidermal growth factor-related recep (DNER)      |
| Eotaxin-1 (CCL11)                                                      |
| Eukaryotic translation initiation factor 4E-binding protein 1 (4E-BP1) |
| Fibroblast growth factor 5 (FGF-5)                                     |
| Fibroblast growth factor 19 (FGF-19)                                   |
| Fibroblast growth factor 21 (FGF-21)                                   |
| Fibroblast growth factor 23 (FGF-23)                                   |
| Fms-related tyrosine kinase 3 ligand (Flt3L)                           |
| Fractalkine (CX3CL1 )                                                  |

|                                                                               |
|-------------------------------------------------------------------------------|
| Glial cell line-derived neurotrophic factor (GDNF)                            |
| Hepatocyte growth factor (HGF)                                                |
| Interferon gamma (IFN-gamma)                                                  |
| Interleukin-1 alpha (IL-1 alpha)                                              |
| Interleukin-2 (IL-2)                                                          |
| Interleukin-2 receptor subunit beta (IL-2RB)                                  |
| Interleukin-4 (IL-4)                                                          |
| Interleukin-5 (IL-5)                                                          |
| Interleukin-6 (IL-6)                                                          |
| Interleukin-7 (IL-7)                                                          |
| Interleukin-8 (IL-8)                                                          |
| Interleukin-10 (IL-10)                                                        |
| Interleukin-10 receptor subunit alpha (IL-10RA)                               |
| Interleukin-10 receptor subunit beta (IL-10RB)                                |
| Interleukin-12 subunit beta (IL-12B)                                          |
| Interleukin-13 (IL-13)                                                        |
| Interleukin-15 receptor subunit alpha (IL-15RA)                               |
| Interleukin-17A (IL-17A)                                                      |
| Interleukin-17C (IL-17C)                                                      |
| Interleukin-18 (IL-18)                                                        |
| Interleukin-18 receptor 1 (IL-18R1)                                           |
| Interleukin-20 (IL-20)                                                        |
| Interleukin-20 receptor subunit alpha (IL-20RA)                               |
| Interleukin-22 receptor subunit alpha-1 (IL-22 RA1)                           |
| Interleukin-24 (IL-24)                                                        |
| Interleukin-33 (IL-33)                                                        |
| Latency-associated peptide transforming growth factor beta 1 (LAP TGF-beta-1) |
| Leukemia inhibitory factor (LIF)                                              |
| Leukemia inhibitory factor receptor (LIF-R)                                   |
| Macrophage colony-stimulating factor 1 (CSF-1)                                |
| Macrophage inflammatory protein 1-alpha (CCL3)                                |
| Matrix metalloproteinase-1 (MMP-1)                                            |

|                                                               |
|---------------------------------------------------------------|
| Matrix metalloproteinase-10 (MMP-10)                          |
| Monocyte chemotactic protein 1 (MCP-1)                        |
| Monocyte chemotactic protein 2 (MCP-2)                        |
| Monocyte chemotactic protein 3 (MCP-3)                        |
| Monocyte chemotactic protein 4 (MCP-4)                        |
| Natural killer cell receptor 2B4 (CD244)                      |
| Neurotrophin-3 (NT-3)                                         |
| Neurturin (NRTN)                                              |
| Oncostatin-M (OSM)                                            |
| Osteoprotegerin (OPG)                                         |
| Programmed cell death 1 ligand 1 (PD-L1)                      |
| Protein S100-A12 (EN-RAGE )                                   |
| Signaling lymphocytic activation molecule (SLAMF1)            |
| SIR2-like protein 2 (SIRT2)                                   |
| STAM-binding protein (STAMPB)                                 |
| Stem cell factor (SCF)                                        |
| Sulfotransferase 1A1 (ST1A1)                                  |
| T-cell surface glycoprotein CD5 (CD5)                         |
| T-cell surface glycoprotein CD6 isoform (CD6)                 |
| T-cell surface glycoprotein CD8 alpha chain (CD8A)            |
| Thymic stromal lymphopoietin (TSLP)                           |
| TNF-beta (TNFB)                                               |
| TNF-related activation-induced cytokine (TRANCE)              |
| TNF-related apoptosis-inducing ligand (TRAIL)                 |
| Transforming growth factor alpha (TGF-alpha)                  |
| Tumor necrosis factor (Ligand) superfamily, member 12 (TWEAK) |
| Tumor necrosis factor (TNF)                                   |
| Tumor necrosis factor ligand superfamily member 14 (TNFSF14)  |
| Tumor necrosis factor receptor superfamily member 9 (TNFRSF9) |
| Urokinase-type plasminogen activator (uPA)                    |
| Vascular endothelial growth factor A (VEGF-A)                 |
