# Supplementary material for: Dynamics of inflammation-associated plasma proteins following faecal microbiota transplantation in patients with psoriatic arthritis and healthy controls: exploratory findings from the FLORA trial
Source: PubMed Central journal article supplement — RMD Open. 2024 Jan 30;10(1):e003750. doi: 10.1136/rmdopen-2023-003750 (PMC10836383; doi:10.1136/rmdopen-2023-003750), 2024-01-30
Supplement: rmdopen-2023-003750supp004.pdf [file rmdopen-2023-003750supp004.pdf]

**Supplemental table S2. Patient and healthy controls sex and age-interval matching list.**

| <b>Age interval (years)</b> | <b>Women</b> | <b>Men</b> |
|-----------------------------|--------------|------------|
| <b>20-24</b>                | 1            |            |
| <b>25-29</b>                |              |            |
| <b>30-34</b>                |              | 3          |
| <b>35-39</b>                | 2            | 2          |
| <b>40-44</b>                | 3            |            |
| <b>45-49</b>                | 3            | 1          |
| <b>50-54</b>                | 2            |            |
| <b>55-59</b>                | 5            |            |
| <b>60-64</b>                | 2            | 1          |
| <b>65-69</b>                | 2            | 4          |
